# Supplementary material for: Prediction of Specific TCR-Peptide Binding From Large Dictionaries of TCR-Peptide Pairs
Source: PubMed Central journal article supplement (PMC7477042; doi:10.3389/fimmu.2020.01803), 2020-08-25

## Supplementary Material

### 1 Supplementary Figures and Tables

*Table S1: TCR autoencoder accuracy per number of mismatches allowed in sequence decoding.*

| Number of mismatches allowed | Autoencoder Accuracy |
|------------------------------|----------------------|
| 0                            | 0.920                |
| 1                            | 0.982                |
| 2                            | 0.993                |

*Table S2: TPP Train and test dataset sizes of all trained models for the different versions of the ERGO classifier (AE vs. LSTM and McPAS<sup>26</sup> vs VDJdb<sup>27</sup>).*

| Iteration | Database          | McPAS |       |       |       | VDJdb  |       |        |       |
|-----------|-------------------|-------|-------|-------|-------|--------|-------|--------|-------|
|           |                   | AE    |       | LSTM  |       | AE     |       | LSTM   |       |
|           |                   | Train | Test  | Train | Test  | Train  | Test  | Train  | Test  |
| 1         | TCR/Peptide pairs | 66985 | 17316 | 67646 | 16659 | 209713 | 52758 | 209779 | 52693 |
|           | Positive pairs    | 11164 | 2886  | 11274 | 2776  | 34952  | 8793  | 34963  | 8782  |
|           | Negative pairs    | 55821 | 14430 | 56372 | 13883 | 174761 | 43965 | 174816 | 43911 |
|           | New test TCRs     |       | 2119  |       | 2047  |        | 5852  |        | 5873  |
|           | TPP-II test size  |       | 13607 |       | 13043 |        | 37714 |        | 37554 |
|           | New test peptides |       | 14    |       | 28    |        | 10    |        | 5     |
|           | TPP-III test size |       | 101   |       | 190   |        | 56    |        | 28    |
| 2         | TCR/Peptide pairs | 67351 | 16952 | 67094 | 17210 | 211209 | 51264 | 209396 | 53078 |
|           | Positive pairs    | 11225 | 2825  | 11182 | 2868  | 35201  | 8544  | 34899  | 8846  |
|           | Negative pairs    | 56126 | 14127 | 55912 | 14342 | 176008 | 42720 | 174497 | 44232 |
|           | New test TCRs     |       | 2092  |       | 2118  |        | 5734  |        | 5918  |
|           | TPP-II test size  |       | 13248 |       | 13843 |        | 36746 |        | 37912 |
|           | New test peptides |       | 21    |       | 15    |        | 14    |        | 12    |
|           | TPP-III test size |       | 91    |       | 79    |        | 98    |        | 66    |
| 3         | TCR/Peptide pairs | 67286 | 17018 | 67592 | 16711 | 209538 | 52933 | 209832 | 52638 |
|           | Positive pairs    | 11214 | 2836  | 11265 | 2785  | 34923  | 8822  | 34972  | 8773  |
|           | Negative pairs    | 56072 | 14182 | 56327 | 13926 | 174615 | 44111 | 174860 | 43865 |
|           | New test TCRs     |       | 2105  |       | 2011  |        | 5858  |        | 5820  |
|           | TPP-II test size  |       | 13357 |       | 12955 |        | 37575 |        | 37198 |
|           | New test peptides |       | 24    |       | 17    |        | 15    |        | 16    |
|           | TPP-III test size |       | 160   |       | 120   |        | 112   |        | 117   |
| 4         | TCR/Peptide pairs | 67644 | 16658 | 67489 | 16814 | 210232 | 52245 | 210440 | 52035 |
|           | Positive pairs    | 11274 | 2776  | 11248 | 2802  | 35038  | 8707  | 35073  | 8672  |
|           | Negative pairs    | 56370 | 13882 | 56241 | 14012 | 175194 | 43538 | 175367 | 43363 |
|           | New test TCRs     |       | 2076  |       | 2064  |        | 5804  |        | 5803  |

|   |                          |       |       |       |       |        |       |        |       |
|---|--------------------------|-------|-------|-------|-------|--------|-------|--------|-------|
|   | <b>TPP-II test size</b>  |       | 13214 |       | 13187 |        | 37354 |        | 37359 |
|   | <b>New test peptides</b> |       | 25    |       | 24    |        | 9     |        | 18    |
|   | <b>TPP-III test size</b> |       | 173   |       | 124   |        | 62    |        | 113   |
| 5 | <b>TCR/Peptide pairs</b> | 67332 | 16968 | 67014 | 17290 | 209670 | 52802 | 209365 | 53108 |
|   | <b>Positive pairs</b>    | 11222 | 2828  | 11169 | 2881  | 34945  | 8800  | 34894  | 8851  |
|   | <b>Negative pairs</b>    | 56110 | 14140 | 55845 | 14409 | 174725 | 44002 | 174471 | 44257 |
|   | <b>New test TCRs</b>     |       | 2088  |       | 2122  |        | 5895  |        | 5914  |
|   | <b>TPP-II test size</b>  |       | 13258 |       | 13389 |        | 37766 |        | 37996 |
|   | <b>New test peptides</b> |       | 19    |       | 20    |        | 9     |        | 13    |
|   | <b>TPP-III test size</b> |       | 115   |       | 146   |        | 62    |        | 57    |

**Table S3:** Comparison between the different versions of the ERGO classifier (AE vs. LSTM) and existing NetTCR<sup>21</sup> models. TPP-II results are shown.

| Model          | Train data                  | Test data                   | TPP-II score |
|----------------|-----------------------------|-----------------------------|--------------|
| ERGO AE        | IEDB + MIRA (80%)           | IEDB + MIRA (20%)           | 0.886        |
| ERGO LSTM      | IEDB + MIRA (80%)           | IEDB + MIRA (20%)           | 0.883        |
| NetTCR INT_NEG | IEDB                        | MIRA (shared IEDB peptides) | 0.697        |
| NetTCR ADD_NEG | IEDB + additional negatives | MIRA (shared IEDB peptides) | 0.727        |

**Table S4:** Comparison between the different versions of the ERGO classifier (AE vs. LSTM and McPAS<sup>26</sup> vs VDJdb<sup>27</sup>) for the SPB task. Peptides with more than 50 TCRs in each database are shown. The values are the AUC over the test set of unseen TCR for this peptide.

| McPAS                |          |          | VDJdb      |          |          |
|----------------------|----------|----------|------------|----------|----------|
| Model                | AE       | LSTM     | Model      | AE       | LSTM     |
| Peptide              |          |          | Peptide    |          |          |
| LPRRGAAGA            | 0.772431 | 0.767037 | KLGGALQAK  | 0.695061 | 0.731208 |
| GILGFVFTL            | 0.843091 | 0.832766 | GILGFVFTL  | 0.820975 | 0.817835 |
| NLVPMVATV            | 0.835317 | 0.821623 | NLVPMVATV  | 0.665098 | 0.686264 |
| GLCTLVAML            | 0.803314 | 0.816092 | AVFDRKSDAK | 0.676548 | 0.695028 |
| SSYRRPVGI            | 0.969659 | 0.980026 | RAKFKQLL   | 0.828297 | 0.825514 |
| RFYKTLRAEQASQ        | 0.967792 | 0.936695 | ELAGIGILTV | 0.735488 | 0.862051 |
| SSLENFRAYV           | 0.942426 | 0.942475 | GLCTLVAML  | 0.764231 | 0.770183 |
| WEDLFCDESLSSPEPPSSSE | 0.901104 | 0.920351 | IVTDFSVIK  | 0.763487 | 0.764299 |
| CRVLCCYVL            | 0.770348 | 0.768169 | SSYRRPVGI  | 0.989022 | 0.986433 |
| ASNENMETM            | 0.940957 | 0.944221 | SSLENFRAYV | 0.969169 | 0.970508 |
| ELAGIGILTV           | 0.828654 | 0.816382 | RLRAEAQVK  | 0.726325 | 0.695372 |
| LLWNGPMAV            | 0.856099 | 0.838728 | TPPESANL   | 0.966307 | 0.970118 |
| VTEHDTLLY            | 0.810553 | 0.815736 | CTPYDINQM  | 0.959594 | 0.968356 |
| TPRVTGGGAM           | 0.803075 | 0.787879 | LLWNGPMAV  | 0.725481 | 0.75429  |
| HGIRNASFI            | 0.959277 | 0.959055 | HGIRNASFI  | 0.971845 | 0.981121 |

|                       |          |          |                      |          |          |
|-----------------------|----------|----------|----------------------|----------|----------|
| EAAGIGILTV            | 0.854633 | 0.85533  | ASNENMETM            | 0.974924 | 0.976743 |
| FRCPRRFCF             | 0.824175 | 0.790418 | PKYVKQNTLKLAT        | 0.691382 | 0.663138 |
| VEALYLVCG             | 0.907081 | 0.935765 | FRDYVDRFYKTLRAEQASQE | 0.952822 | 0.936532 |
| LSLRNPILV             | 0.902143 | 0.924408 | KRWIILGLNK           | 0.842182 | 0.837442 |
| RPHRNGFTVL            | 0.714755 | 0.731987 | SSPPMFRV             | 0.984529 | 0.985437 |
| SSPPMFRV              | 0.976377 | 0.977021 | STPESANL             | 0.969857 | 0.974328 |
| RAKFKQLL              | 0.832942 | 0.814849 | LSLRNPILV            | 0.93783  | 0.963003 |
| KAFSPEVIPMF           | 0.843734 | 0.913372 | CINGVCWTV            | 0.813524 | 0.827376 |
| NLNCCSVPV             | 0.850514 | 0.789345 | TPRVTTGGGAM          | 0.845308 | 0.841128 |
| MEVGWYRSPFSRVVHLYRNGK | 0.987286 | 0.983272 | LLLGIGILV            | 0.728453 | 0.682906 |
| KRWIILGLNK            | 0.767641 | 0.766451 | KAFSPEVIPMF          | 0.840425 | 0.902281 |
| FPRPWLHGL             | 0.795516 | 0.884843 | ATDALMTGY            | 0.884728 | 0.83388  |
| TVYGFCLL              | 0.874119 | 0.911252 | VTEHDTLLY            | 0.625833 | 0.639702 |
| KMVAVFYTT             | 0.757869 | 0.79095  | EIYKRWII             | 0.775054 | 0.768612 |
| RPRGEVRFL             | 0.862574 | 0.922006 | FLKEKGGL             | 0.738713 | 0.747265 |
| ATDALMTGY             | 0.941682 | 0.869135 | GTSGSPIVNR           | 0.84617  | 0.854691 |
| YVLDHLIVV             | 0.878755 | 0.7948   | TVYGFCLL             | 0.970757 | 0.972494 |
| VVLSWAPPV             | 0.710898 | 0.721487 | GTSGSPIINR           | 0.862618 | 0.864304 |
| YSEHPTFTSQY           | 0.868444 | 0.719544 | SQLLNAKYL            | 0.987209 | 0.985011 |
| HPKVSSEVHI            | 0.840526 | 0.846167 | LPRRSGAAGA           | 0.619644 | 0.585148 |
|                       |          |          | NLSALGIFST           | 0.707337 | 0.756388 |
|                       |          |          | RPRGEVRFL            | 0.89807  | 0.951702 |
|                       |          |          | ARMILMTHF            | 0.920818 | 0.9468   |
|                       |          |          | SFHSLLHF             | 0.736924 | 0.7445   |
|                       |          |          | QARQMVQAMRTIGTHP     | 0.650485 | 0.665243 |
|                       |          |          | KAVYNFATC            | 0.894006 | 0.932316 |
|                       |          |          | GLIYNRMGAVTTEV       | 0.642705 | 0.606565 |
|                       |          |          | TPQDLNTML            | 0.752846 | 0.737685 |
|                       |          |          | IPSINVHHY            | 0.75858  | 0.74078  |
|                       |          |          | DPFRLLQNSQVFS        | 0.67448  | 0.747417 |
|                       |          |          | YVLDHLIVV            | 0.678381 | 0.723087 |
|                       |          |          | YSEHPTFTSQY          | 0.802649 | 0.869689 |
|                       |          |          | KLVALGINAV           | 0.634441 | 0.718725 |
|                       |          |          | RTLNAWVKV            | 0.555511 | 0.672836 |
|                       |          |          | FLRGRAYGL            | 0.90147  | 0.843084 |
|                       |          |          | FPRPWLHGL            | 0.865248 | 0.760968 |
|                       |          |          | AMFWSVPTV            | 0.591343 | 0.707997 |
|                       |          |          | TPGPGVRYPL           | 0.797351 | 0.747012 |
|                       |          |          | KRWIIMGLNK           | 0.853095 | 0.828291 |
|                       |          |          | AYAQKIFKI            | 0.598942 | 0.595577 |
|                       |          |          | SLFNTVATLY           | 0.677828 | 0.682458 |
|                       |          |          | FLYALALL             | 0.878    | 0.883727 |
|                       |          |          | GPGHKARVL            | 0.544828 | 0.742347 |
|                       |          |          | LLFGYPVYV            | 0.614185 | 0.666065 |

|  |  |  |                |          |          |
|--|--|--|----------------|----------|----------|
|  |  |  | MLNIPSINV      | 0.583162 | 0.635572 |
|  |  |  | SLYNTVATL      | 0.795793 | 0.77279  |
|  |  |  | NEGVKAAW       | 0.817963 | 0.724294 |
|  |  |  | FLASKIGRLV     | 0.669265 | 0.721543 |
|  |  |  | QVPLRPMTYK     | 0.821861 | 0.849146 |
|  |  |  | SGPLKAEIAQRLED | 0.746869 | 0.631266 |
|  |  |  | EPLPQGQLTAY    | 0.880626 | 0.85187  |
|  |  |  | SYIGSINNI      | 0.965756 | 0.954853 |
|  |  |  | HPVGEADYFEY    | 0.94127  | 0.89122  |
|  |  |  | FLYNLLTRV      | 0.620185 | 0.708811 |
|  |  |  | NAITNAKII      | 0.968216 | 0.938254 |
|  |  |  | GTSGSPIIDK     | 0.72907  | 0.733715 |
|  |  |  | ISPRTLNAW      | 0.686906 | 0.722699 |
|  |  |  | HPKVSSEVHI     | 0.847606 | 0.73928  |
|  |  |  | RPPIFIRRL      | 0.803643 | 0.822873 |
|  |  |  | LLDFVRFMGV     | 0.773148 | 0.634493 |
|  |  |  | QYDPVAALF      | 0.617483 | 0.624344 |

**Supp. Mat. Table S5:** Comparison between the different versions of the ERGO classifier (AE vs. LSTM and McPAS<sup>26</sup> vs VDJD<sup>27</sup>) and existing classifiers (TCRGP by Jokinen et al.<sup>19</sup>, TCRex by Gielis et al.<sup>20</sup>) for the SPB task. The peptides are those from VDJD tested by Jokinen et al. The values are the AUC over the test set of unseen TCR for this peptide.

| Peptide       | ERGO  |       | TCRGP ( $\beta$ ,3) |            | TCRex     |
|---------------|-------|-------|---------------------|------------|-----------|
|               | AE    | LSTM  | LOSO                | unique LOO |           |
| IPSINVHHY     | 0.758 | 0.74  | 0.852               | 0.797      | 0.84±0.04 |
| TPRVTTGGAM    | 0.845 | 0.841 | 0.892               | 0.768      | 0.88±0.03 |
| NLVPMVATV     | 0.665 | 0.686 | 0.912               | 0.838      | 0.72±0.01 |
| GLCTLVAML     | 0.764 | 0.77  | 0.926               | 0.782      | 0.82±0.08 |
| RAKFKQLL      | 0.828 | 0.825 | 0.887               | 0.729      | 0.89±0.01 |
| YVLDHLIVV     | 0.678 | 0.723 | 0.682               | 0.541      | 0.76±0.07 |
| GILGFVFTL     | 0.82  | 0.817 | 0.881               | 0.804      | 0.81±0.01 |
| PKYVKQNTLKLAT | 0.691 | 0.663 | 0.706               | 0.563      | 0.72±0.02 |
| CINGVCWTV     | 0.813 | 0.827 | 0.819               | 0.887      | 0.75±0.06 |
| KLVALGINAV    | 0.634 | 0.718 | 0.695               | 0.484      | 0.73±0.08 |
| ATDALMTGY     | 0.884 | 0.833 | 0.678               | 0.677      | 0.91±0.04 |
| RPRGEVRFL     | 0.897 | 0.951 | 0.801               | 0.694      | 0.92±0.05 |
| LLWNGPMAV     | 0.725 | 0.754 | 0.825               | 0.813      | 0.79±0.01 |
| GTSGSPIVNR    | 0.846 | 0.854 | 0.864               | 0.832      | 0.88±0.04 |
| GTSGSPIINR    | 0.855 | 0.864 | 0.734               | 0.736      | 0.86±0.03 |
| KAFSPEVIPMF   | 0.84  | 0.902 | 0.769               | 0.755      | 0.9±0.01  |
| TPQDLNTML     | 0.752 | 0.737 | 0.798               | 0.742      | 0.94±0.04 |
| EIYKRWII      | 0.775 | 0.768 | 0.75                | 0.904      | 0.75±0.06 |
| KRWIILGLNK    | 0.839 | 0.837 | 0.702               | 0.535      | 0.85±0.04 |

|                      |       |       |       |       |           |
|----------------------|-------|-------|-------|-------|-----------|
| FRDYVDRFYKTLRAEQASQE | 0.952 | 0.936 | 0.893 | 0.822 | 1.0±0.0   |
| GPGHKARVL            | 0.544 | 0.742 | 0.838 | 0.803 | -         |
| FLKEKGGL             | 0.738 | 0.747 | 0.817 | 0.766 | 0.76±0.06 |

**Supp. Mat. Table S6:** The peptides with the highest number of binding TCRs in McPAS<sup>26</sup> and VDJdb<sup>27</sup> databases, in decreasing order. The 30 most frequent peptides in both databases are shown.

| McPAS                 |      | VDJdb                |       |
|-----------------------|------|----------------------|-------|
| Peptide               | TCRs | Peptide              | TCRs  |
| LPRRSGAAGA            | 2145 | KLGGALQAK            | 27842 |
| GILGFVFTL             | 1920 | GILGFVFTL            | 7008  |
| NLVPMVATV             | 1134 | NLVPMVATV            | 4991  |
| GLCTLVAML             | 1091 | AVFDRKSDAK           | 3534  |
| SSYRRPVGI             | 653  | RAKFKQLL             | 2720  |
| RFYKTLRAEQASQ         | 602  | ELAGIGILTV           | 2519  |
| SSLENFRAYV            | 549  | GLCTLVAML            | 1599  |
| WEDLFCDESLSSPEPPSSSE  | 477  | IVTDFSVIK            | 1480  |
| CRVLCCYVL             | 435  | SSYRRPVGI            | 1306  |
| ASNENMETM             | 427  | SSLENFRAYV           | 866   |
| ELAGIGILTV            | 325  | RLRAEAQVK            | 860   |
| LLWNGPMAV             | 307  | TPESANL              | 859   |
| VTEHDTLLY             | 280  | CTPYDINQM            | 814   |
| TPRVTGGGAM            | 279  | LLWNGPMAV            | 697   |
| HGIRNASFI             | 279  | HGIRNASFI            | 558   |
| EAAGIGILTV            | 278  | ASNENMETM            | 536   |
| FRCPRRFCF             | 266  | PKYVKQNTLKLAT        | 484   |
| VEALYLVCG             | 207  | FRDYVDRFYKTLRAEQASQE | 471   |
| LSLRNPILV             | 203  | KRWIILGLNK           | 413   |
| RIPHERNGFTVL          | 191  | SSPPMFRV             | 326   |
| SSPPMFRV              | 163  | STPESANL             | 309   |
| RAKFKQLL              | 144  | LSLRNPILV            | 290   |
| KAFSPEVIPMF           | 143  | CINGVCWTV            | 284   |
| NLNCCSVPV             | 128  | TPRVTGGGAM           | 273   |
| MEVGWYRSPFSRVVHLYRNGK | 128  | LLLGIGILV            | 233   |
| KRWIILGLNK            | 99   | KAFSPEVIPMF          | 227   |
| FPRPWLHGL             | 88   | ATDALMTGY            | 207   |
| TVYGFCLL              | 87   | VTEHDTLLY            | 203   |
| KMVAVFYTT             | 74   | EIYKRWII             | 176   |
| RPRGEVRFL             | 65   | FLKEKGGL             | 175   |

**Supp. Mat. Table S7: Single peptide binding (SPB) test sizes of all trained models for the different versions of the ERGO classifier (AE vs. LSTM and McPAS<sup>26</sup> vs VDJdb<sup>27</sup>). This table matches the results reported in Table 1 and Table 2.**

| Iteration             | Database              | Peptide               | McPAS      |      | Peptide    | VDJdb     |      | Peptide   | McPAS + VDJdb |      |      |
|-----------------------|-----------------------|-----------------------|------------|------|------------|-----------|------|-----------|---------------|------|------|
|                       |                       |                       | AE         | LSTM |            | AE        | LSTM |           | AE            | LSTM |      |
| 1                     | Model type            |                       |            |      |            |           |      |           |               |      |      |
|                       | Positive test samples | LPRRSGAAGA            | 435        | 403  | KLGGALQAK  | 2791      | 2775 | GLCTLVAML | 472           | 476  |      |
|                       | Negative test samples |                       | 1390       | 1290 |            | 4585      | 4566 |           | 2682          | 2654 |      |
|                       | Positive test samples | GILGFVFTL             | 345        | 315  | GILGFVFTL  | 1001      | 983  | NLVPMVATV | 1129          | 1124 |      |
|                       | Negative test samples |                       | 1222       | 1122 |            | 4474      | 4253 |           | 5012          | 5133 |      |
|                       | Positive test samples | NLVPMVATV             | 187        | 164  | NLVPMVATV  | 941       | 992  | GILGFVFTL | 1315          | 1272 |      |
|                       | Negative test samples |                       | 929        | 750  |            | 4237      | 4372 |           | 5703          | 5629 |      |
|                       | Positive test samples | GLCTLVAML             | 200        | 220  | AVFDRKSDAK | 355       | 338  |           |               |      |      |
|                       | Negative test samples |                       | 914        | 985  |            | 2230      | 2248 |           |               |      |      |
|                       | Positive test samples | SSYRRPVGI             | 130        | 146  | RAKFKQLL   | 284       | 284  |           |               |      |      |
|                       | Negative test samples |                       | 641        | 665  |            | 1932      | 2010 |           |               |      |      |
|                       | 2                     | Positive test samples | LPRRSGAAGA | 404  | 428        | KLGGALQAK | 2719 | 2881      | GLCTLVAML     | 475  | 460  |
| Negative test samples |                       |                       | 1281       | 1353 |            | 4495      | 4537 |           | 2793          | 2805 |      |
| Positive test samples |                       | GILGFVFTL             | 336        | 312  | GILGFVFTL  | 985       | 978  | NLVPMVATV | 1140          | 1086 |      |
| Negative test samples |                       |                       | 1225       | 1201 |            | 4290      | 4430 |           | 4997          | 5007 |      |
| Positive test samples |                       | NLVPMVATV             | 192        | 169  | NLVPMVATV  | 924       | 947  | GILGFVFTL | 1351          | 1292 |      |
| Negative test samples |                       |                       | 929        | 827  |            | 4060      | 4325 |           | 5654          | 5515 |      |
| Positive test samples |                       | GLCTLVAML             | 211        | 217  | AVFDRKSDAK | 337       | 343  |           |               |      |      |
| Negative test samples |                       |                       | 918        | 960  |            | 2080      | 2184 |           |               |      |      |
| Positive test samples |                       | SSYRRPVGI             | 137        | 148  | RAKFKQLL   | 270       | 307  |           |               |      |      |
| Negative test samples |                       |                       | 687        | 753  |            | 1948      | 2058 |           |               |      |      |
| 3                     |                       | Positive test samples | LPRRSGAAGA | 436  | 420        | KLGGALQAK | 2792 | 2793      | GLCTLVAML     | 438  | 456  |
|                       |                       | Negative test samples |            | 1352 | 1248       |           | 4603 | 4587      |               | 2632 | 2654 |
|                       | Positive test samples | GILGFVFTL             | 321        | 356  | GILGFVFTL  | 1025      | 975  | NLVPMVATV | 1159          | 1107 |      |
|                       | Negative test samples |                       | 1212       | 1302 |            | 4475      | 4348 |           | 5274          | 4950 |      |
|                       | Positive test samples | NLVPMVATV             | 177        | 179  | NLVPMVATV  | 975       | 1008 | GILGFVFTL | 1337          | 1292 |      |
|                       | Negative test samples |                       | 854        | 878  |            | 4417      | 4421 |           | 5633          | 5674 |      |
|                       | Positive test samples | GLCTLVAML             | 232        | 234  | AVFDRKSDAK | 359       | 337  |           |               |      |      |
|                       | Negative test samples |                       | 1022       | 933  |            | 2173      | 2100 |           |               |      |      |
|                       | Positive test samples | SSYRRPVGI             | 136        | 139  | RAKFKQLL   | 301       | 290  |           |               |      |      |
|                       | Negative test samples |                       | 733        | 752  |            | 2114      | 1823 |           |               |      |      |
|                       | 4                     | Positive test samples | LPRRSGAAGA | 437  | 418        | KLGGALQAK | 2764 | 2764      | GLCTLVAML     | 507  | 460  |
|                       |                       | Negative test samples |            | 1354 | 1313       |           | 4500 | 4511      |               | 2945 | 2705 |
| Positive test samples |                       | GILGFVFTL             | 330        | 325  | GILGFVFTL  | 959       | 980  | NLVPMVATV | 1184          | 1125 |      |
| Negative test samples |                       |                       | 1214       | 1217 |            | 4232      | 4360 |           | 5254          | 5059 |      |
| Positive test samples |                       | NLVPMVATV             | 169        | 172  | NLVPMVATV  | 959       | 960  | GILGFVFTL | 1288          | 1340 |      |
| Negative test samples |                       |                       | 735        | 879  |            | 4322      | 4272 |           | 5675          | 5673 |      |
| Positive test samples |                       | GLCTLVAML             | 204        | 186  | AVFDRKSDAK | 346       | 329  |           |               |      |      |
| Negative test samples |                       |                       | 936        | 848  |            | 2172      | 2103 |           |               |      |      |
| Positive test samples |                       | SSYRRPVGI             | 142        | 145  | RAKFKQLL   | 317       | 280  |           |               |      |      |
| Negative test samples |                       |                       | 748        | 706  |            | 2133      | 1964 |           |               |      |      |
| 5                     |                       | Positive test samples | LPRRSGAAGA | 415  | 456        | KLGGALQAK | 2800 | 2848      | GLCTLVAML     | 486  | 465  |
|                       |                       | Negative test samples |            | 1325 | 1432       |           | 4589 | 4571      |               | 2774 | 2624 |
|                       | Positive test samples | GILGFVFTL             | 319        | 314  | GILGFVFTL  | 996       | 986  | NLVPMVATV | 1126          | 1131 |      |
|                       | Negative test samples |                       | 1199       | 1214 |            | 4435      | 4426 |           | 5174          | 5066 |      |
|                       | Positive test samples | NLVPMVATV             | 172        | 173  | NLVPMVATV  | 985       | 949  | GILGFVFTL | 1250          | 1307 |      |
|                       | Negative test samples |                       | 815        | 808  |            | 4416      | 4248 |           | 5448          | 5639 |      |
|                       | Positive test samples | GLCTLVAML             | 219        | 231  | AVFDRKSDAK | 372       | 342  |           |               |      |      |
|                       | Negative test samples |                       | 984        | 949  |            | 2485      | 2132 |           |               |      |      |
|                       | Positive test samples | SSYRRPVGI             | 132        | 134  | RAKFKQLL   | 308       | 291  |           |               |      |      |
|                       | Negative test samples |                       | 655        | 688  |            | 2207      | 1999 |           |               |      |      |

**Supp. Mat. Table S8: Multi Peptide Selection (MPS) test sizes of all trained models for the different versions of the ERGO classifier (AE vs. LSTM and McPAS<sup>26</sup> vs VDJdb<sup>27</sup>). This table matches the results reported in Figure 2A.**

| Iteration | Number of peptides | McPAS |      | VDJdb |      |
|-----------|--------------------|-------|------|-------|------|
|           |                    | AE    | LSTM | AE    | LSTM |
| 1         | 2                  | 624   | 558  | 3096  | 3164 |
|           | 3                  | 763   | 708  | 3732  | 3751 |
|           | 4                  | 871   | 809  | 3913  | 3948 |
|           | 5                  | 951   | 898  | 4082  | 4094 |
|           | 10                 | 1271  | 1200 | 4580  | 4546 |
|           | 20                 | 1633  | 1548 | 5131  | 5096 |
|           | 30                 | 1796  | 1707 | 5393  | 5366 |
| 2         | 2                  | 586   | 610  | 3030  | 3169 |
|           | 3                  | 744   | 767  | 3645  | 3755 |
|           | 4                  | 858   | 861  | 3817  | 3921 |
|           | 5                  | 936   | 942  | 3977  | 4076 |
|           | 10                 | 1268  | 1266 | 4448  | 4580 |

|           |           |          |      |      |      |
|-----------|-----------|----------|------|------|------|
|           | <b>20</b> | 1621     | 1638 | 4953 | 5104 |
|           | <b>30</b> | 1770     | 1805 | 5242 | 5405 |
| <b>3</b>  | <b>2</b>  | 607      | 605  | 3143 | 3136 |
|           | <b>3</b>  | 772      | 771  | 3783 | 3722 |
|           | <b>4</b>  | 871      | 880  | 3961 | 3895 |
|           | <b>5</b>  | 964      | 1037 | 4118 | 4056 |
|           | <b>10</b> | 1265     | 1268 | 4604 | 4546 |
|           | <b>20</b> | 1642     | 1591 | 5116 | 5058 |
|           | <b>30</b> | 1787     | 1726 | 5385 | 5343 |
|           | <b>4</b>  | <b>2</b> | 619  | 591  | 3091 |
| <b>3</b>  |           | 780      | 719  | 3672 | 3676 |
| <b>4</b>  |           | 876      | 818  | 3846 | 3842 |
| <b>5</b>  |           | 963      | 899  | 4013 | 4007 |
| <b>10</b> |           | 1263     | 1212 | 4512 | 4505 |
| <b>20</b> |           | 1614     | 1566 | 5010 | 5023 |
| <b>30</b> |           | 1759     | 1717 | 5308 | 5301 |
| <b>5</b>  |           | <b>2</b> | 585  | 618  | 3174 |
|           | <b>3</b>  | 745      | 774  | 3792 | 3795 |
|           | <b>4</b>  | 837      | 882  | 3987 | 3963 |
|           | <b>5</b>  | 924      | 970  | 4518 | 4126 |
|           | <b>10</b> | 1249     | 1262 | 4635 | 4611 |
|           | <b>20</b> | 1614     | 1624 | 5148 | 5144 |
|           | <b>30</b> | 1763     | 1786 | 5419 | 5427 |

*Supp. Mat. Table S9: An index to each train and test size for the different suggested tests. The training set is always the training set for the TPP-I task.*

| <b>Task</b>    | <b>Train size</b>                | <b>Test description</b>                      | <b>Test size</b>                |
|----------------|----------------------------------|----------------------------------------------|---------------------------------|
| <b>SPB</b>     | Table S2 Train TCR/Peptide pairs | TPP-II (depends on specific peptide)         | Table S7                        |
| <b>MPS</b>     |                                  | TPP-II (depends on number of peptides)       | Table S8                        |
| <b>TPP-I</b>   |                                  | TPP-I (new TCR-peptide pairs)                | Table S2 Test TCR/Peptide pairs |
| <b>TPP-II</b>  |                                  | TPP-II (new TCRs paired with known peptides) | Table S2 TPP-II test size       |
| <b>TPP-III</b> |                                  | TPP-III (new TCRs paired with new peptides)  | Table S2 TPP-III test size      |

**Figure S1:** Differences between McPAS<sup>26</sup> and VDjdb<sup>27</sup> datasets. A) Normalized TCR length distribution in McPAS and VDjdb datasets. B) Normalized peptide length distribution in McPAS and VDjdb datasets. C) T cell type distribution (CD4/CD8) of TCR $\beta$  in McPAS and VDjdb datasets. D) Number of TCRs per peptide distribution, for unique TCRs in McPAS-TCR, unique TCRs in VDjdb, and common TCRs, logarithmic scale.

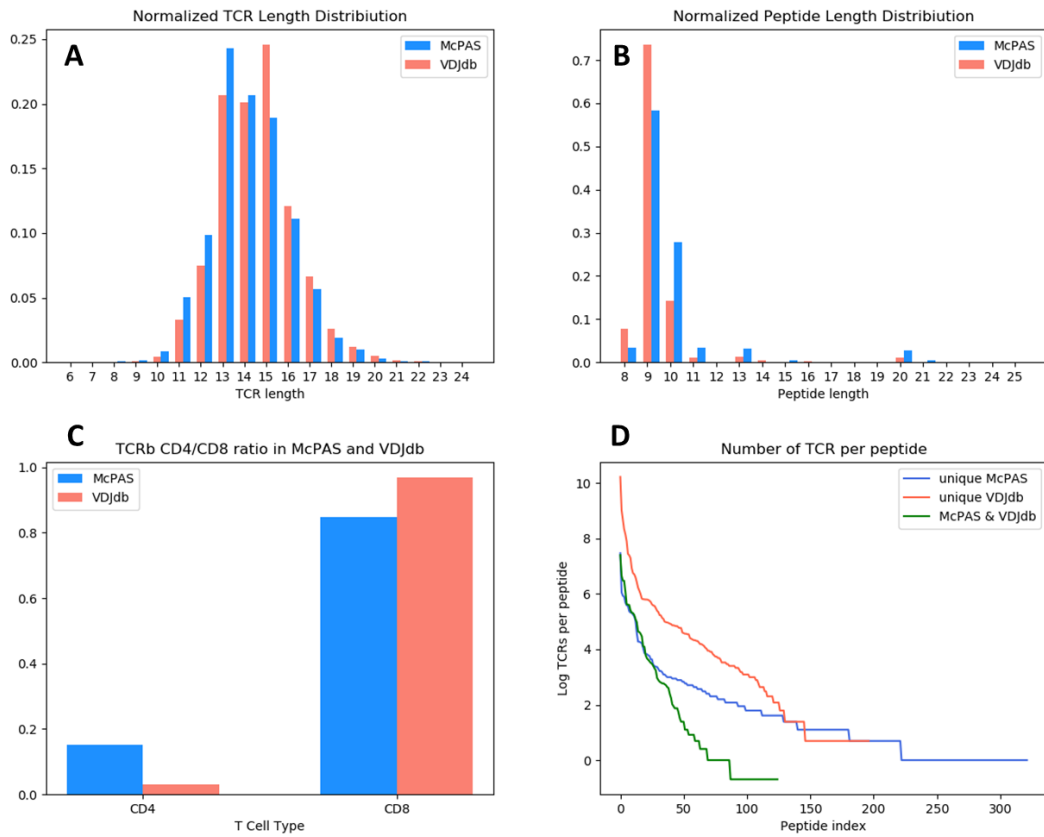

Supplement: Presentation_1.pdf [file Presentation_1.pdf]
